# Supplementary material for: From core–shell MoSx/ZnS to open fullerene-like MoS2 nanoparticles
Source: Royal Society of Chemistry journal article supplement (doi:10.1039/c3ta14888b), 2013-12-16
Supplement: c3ta14888b.pdf [file c3ta14888b.pdf]

## Supporting Information

### From core-shell $\text{MoS}_x/\text{ZnS}$ to open fullerene-like $\text{MoS}_2$ nanoparticles.

*Elodie Blanco, Denis Uzio, Gilles Berhault, Pavel Afanasiev\**

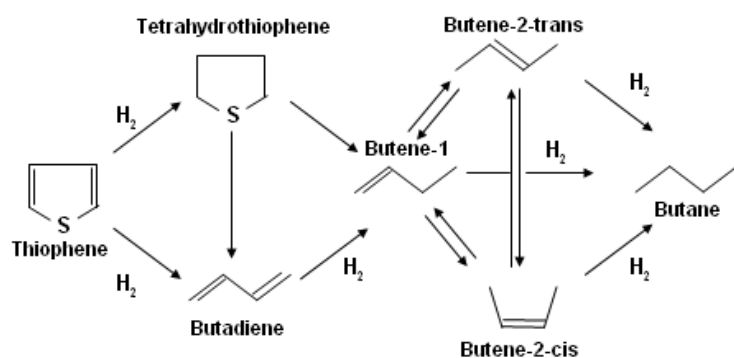

Scheme S1. Thiophene HDS reaction pathways.

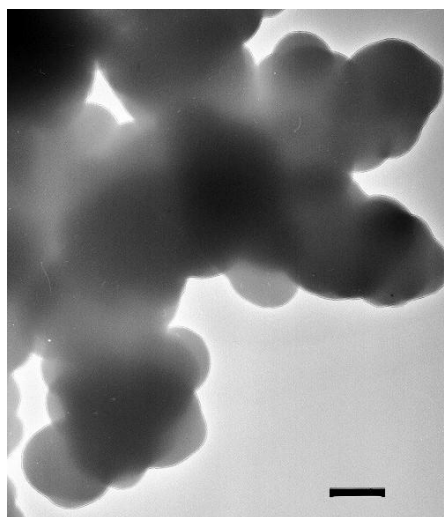

Fig. S1  $\text{MoS}_x$  particles obtained in the EG – sulfur mixture without addition of ZnS  
Scale bar is 200 nm.

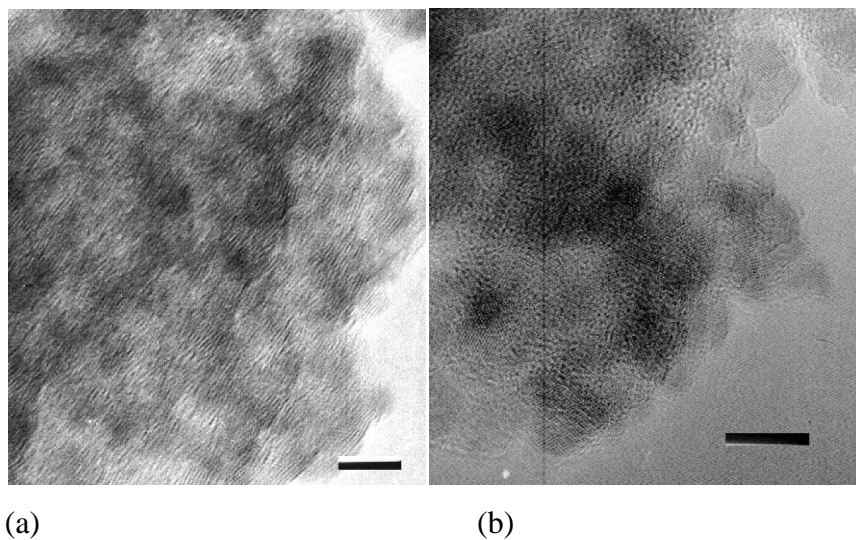

Fig. S2 TEM image of ZnS seed obtained from the precipitation of  $\text{Zn}(\text{NO}_3)_2$  (a) and  $\text{ZnCl}_2$  (b) and  $\text{Na}_2\text{S}$  in ethylene glycol. Scale bar is 10 nm for both images. Note that dried powders are analyzed by TEM in which the particles are forcedly agglomerated, whereas in the colloidal suspension they are separated.

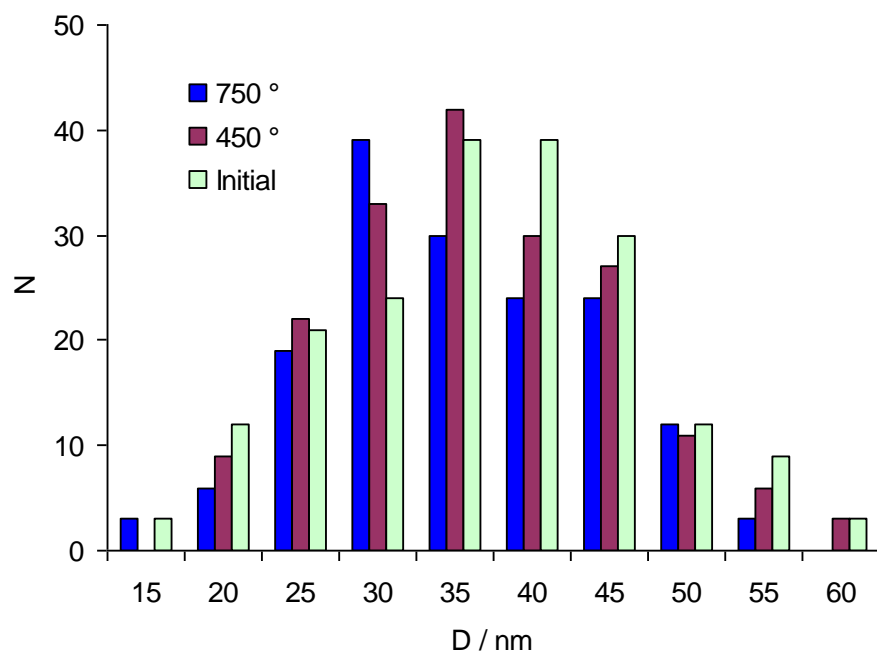

a

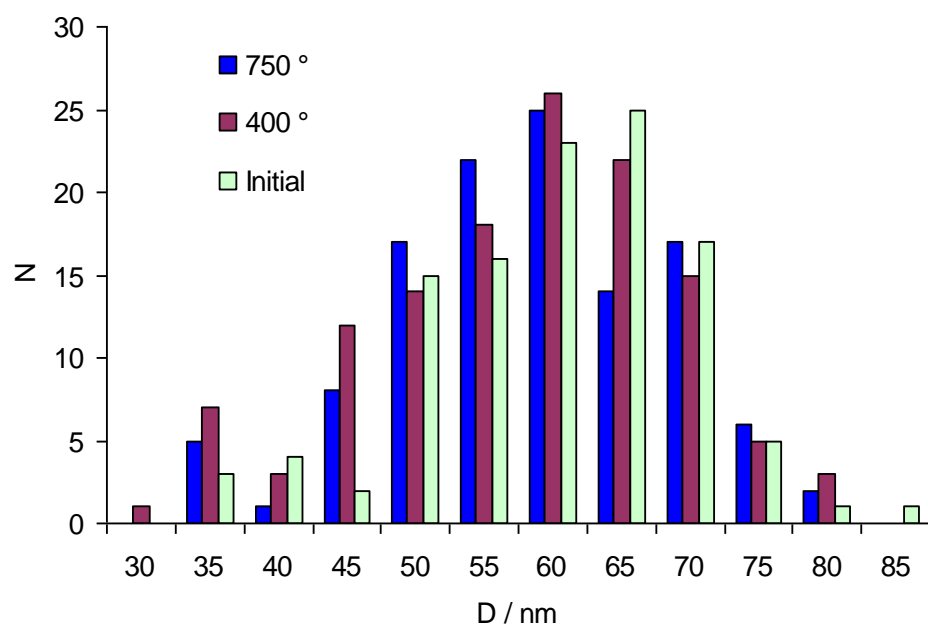

b

Fig. S3 Histograms of particle size for the sample with Mo/Zn = 1 as a function of thermal treatment: a) Mo/Zn = 1, b) Mo/Zn = 2.

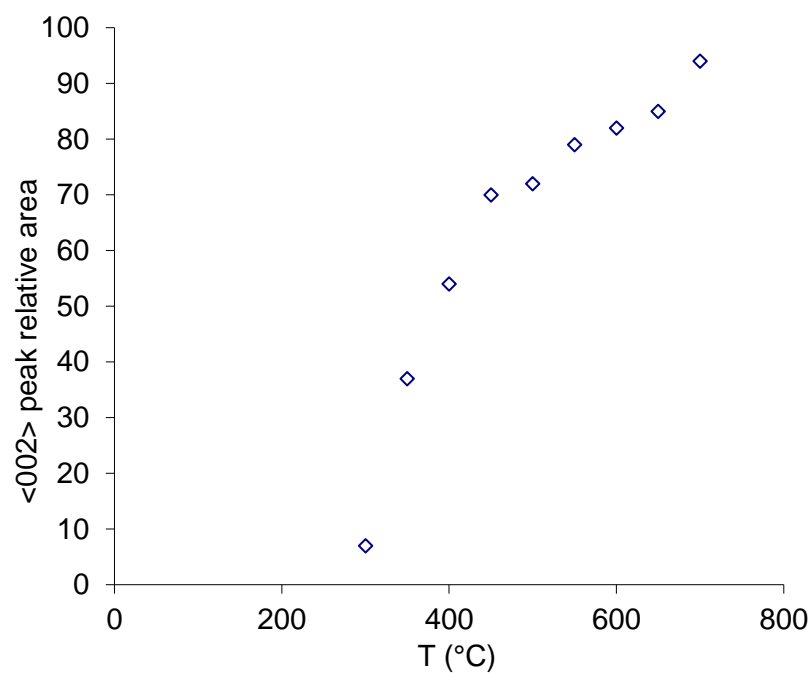

Fig. S4 Relative area of the (002) MoS<sub>2</sub> XRD peak as a function of treatment temperature for the Mo/Zn = 1 sample. Note the breakpoint above 400 °C corresponding to the completion of MoS<sub>2</sub> formation.

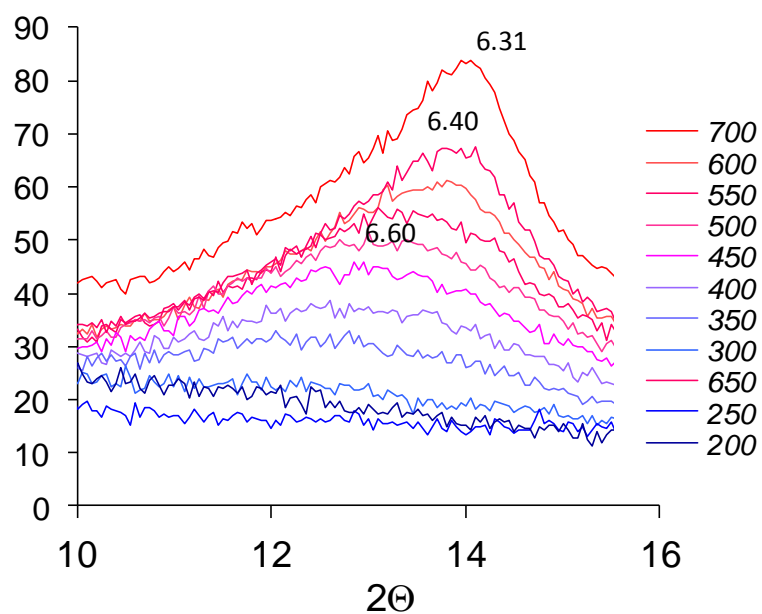

Figure S5 Zoom on the temperature evolution of MoS<sub>2</sub> (002) diffraction peak

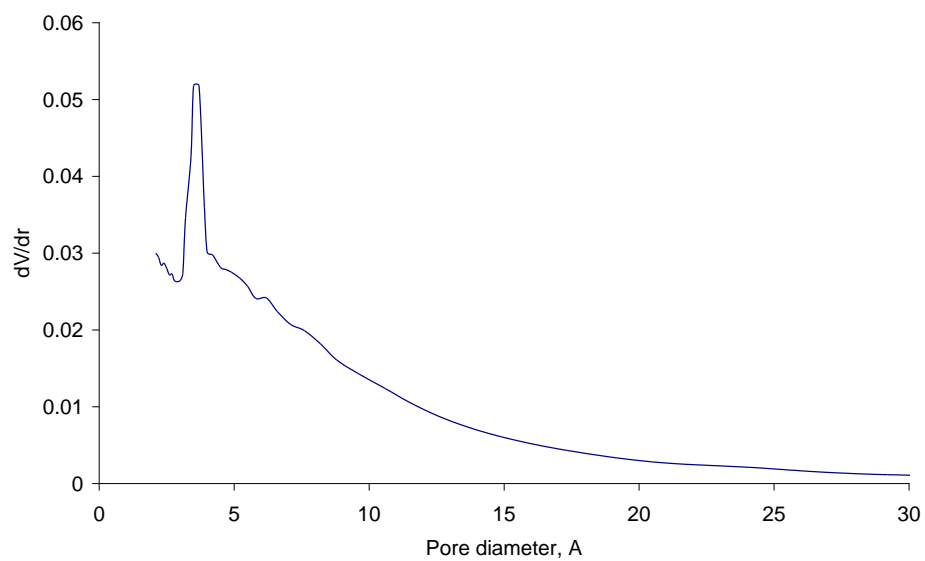

Fig. S6. Pore size distribution in the solid treated under  $H_2/H_2S$  mixture at  $400^\circ C$ ;  $Mo/Zn=1$ . Note the absence of the characteristic feature corresponding to the mesopores formed by ZnS release.

Table S1 Preparation conditions and some properties of the solids studied in this work.

| Zn precursor | Mo/Z n | Treatment T C° | Treatment gas                    | Composition <sup>a</sup>               | Mo/Z n EDS       | Ssp <sup>c</sup> m <sup>2</sup> /g | Particle Size, nm |
|--------------|--------|----------------|----------------------------------|----------------------------------------|------------------|------------------------------------|-------------------|
| Nitrate      | 1      | initial        | -                                | Zn <sub>0.97</sub> MoS <sub>4.80</sub> | 2.9              | - <sup>d</sup>                     | 36                |
| Nitrate      | 1      | 400            | H <sub>2</sub> /H <sub>2</sub> S | Zn <sub>0.97</sub> MoS <sub>3.11</sub> | 2.8              | 33                                 | 29                |
| Nitrate      | 1      | 500            | H <sub>2</sub> /H <sub>2</sub> S | Zn <sub>0.97</sub> MoS <sub>3.13</sub> | 2.8              | 31                                 | 31                |
| Nitrate      | 1      | 600            | H <sub>2</sub> /H <sub>2</sub> S | Zn <sub>0.97</sub> MoS <sub>3.07</sub> | 3.8              | 40                                 | 28                |
| Nitrate      | 1      | 750            | H <sub>2</sub> /H <sub>2</sub> S | Zn <sub>0.97</sub> MoS <sub>3.03</sub> | >50 <sup>b</sup> | 59                                 | 28                |
| Nitrate      | 1      | 750            | H <sub>2</sub>                   | Zn <sub>0.97</sub> MoS <sub>2.78</sub> | >50              | 58                                 | 29                |
| Nitrate      | 1      | 750            | N <sub>2</sub>                   | Zn <sub>0.97</sub> MoS <sub>3.08</sub> | >100             | Nd                                 | 27                |
| Nitrate      | 2      | initial        | -                                | Zn <sub>0.44</sub> MoS <sub>3.9</sub>  | 4.5              | -                                  | 60                |
| Nitrate      | 2      | 400            | H <sub>2</sub> /H <sub>2</sub> S | Zn <sub>0.44</sub> MoS <sub>2.55</sub> | 4.2              | 25                                 | 47                |
| Nitrate      | 2      | 750            | H <sub>2</sub> /H <sub>2</sub> S | Zn <sub>0.44</sub> MoS <sub>2.46</sub> | >50              | 41                                 | 44                |
| Nitrate      | 2      | 750            | N <sub>2</sub>                   | Zn <sub>0.44</sub> MoS <sub>2.67</sub> | >100             | 38                                 | 46                |
| Chloride     | 1      | initial        | -                                | Zn <sub>0.94</sub> MoS <sub>4.60</sub> | 3.2              | -                                  | 39                |
| Chloride     | 1      | 400            | H <sub>2</sub> /H <sub>2</sub> S | Zn <sub>0.94</sub> MoS <sub>3.12</sub> | 2.9              | 30                                 | 33                |
| Chloride     | 1      | 750            | H <sub>2</sub> /H <sub>2</sub> S | Zn <sub>0.94</sub> MoS <sub>3.01</sub> | >50              | 57                                 | 29                |
| Chloride     | 1      | 750            | N <sub>2</sub>                   | Zn <sub>0.94</sub> MoS <sub>3.00</sub> | >100             | 58                                 | 31                |
| Chloride     | 2      | initial        | -                                | Zn <sub>0.48</sub> MoS <sub>4.1</sub>  | 4.8              | -                                  | 57                |
| Chloride     | 2      | 400            | H <sub>2</sub> /H <sub>2</sub> S | Zn <sub>0.48</sub> MoS <sub>2.59</sub> | 4.5              | 30                                 | 48                |
| Chloride     | 2      | 750            | H <sub>2</sub> /H <sub>2</sub> S | Zn <sub>0.48</sub> MoS <sub>2.46</sub> | >100             | 47                                 | 46                |

<sup>a</sup> – elemental analysis; <sup>b</sup> – in the MoS<sub>2</sub>-containing part only; <sup>c</sup> – BET specific surface area; <sup>d</sup> – BET surface area of the initial samples can not be determined since they slowly decompose under outgasing conditions.
